# Supplementary material
Source: PubMed Central journal article supplement (PMC4248902)
Supplement: JVI.01509-14_zjv999099680so3.pdf [file JVI.01509-14_zjv999099680so3.pdf]

## Supplement Movie Legend

**Movie S1.** A short movie demonstrating satisfactory fitting of HSV-1 UL25 crystal structure (magenta ribbon, PDB ID: 2F5U) in the penton-binding globular region of KSHV tegument density.

**Movie S2.** Viewing KSHV tegument density as a whole and as individual components.
