# Supplementary material
Source: PubMed Central journal article supplement (PMC4248902)

## Supplement Figure S1 Legend

**Figure S1.** Zoom-in views of KSHV capsid around the penton with different contour levels. (A) Contour level is  $0.5\bar{\delta}$  above the mean,  $\bar{\delta}$  is the standard deviation; (B) Contour level is  $2\bar{\delta}$ . Note that the tegument densities are only visible at low contour level, suggesting low occupancy or high flexibility.

**A**  
**Cl=0.58**

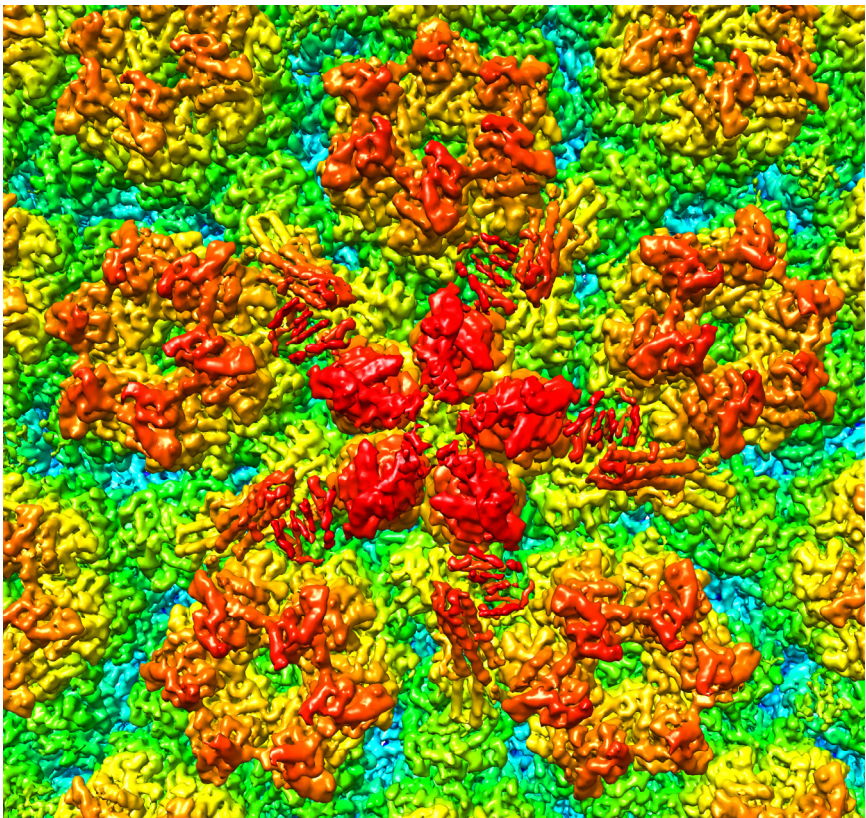

**B**  
**Cl=2.6**

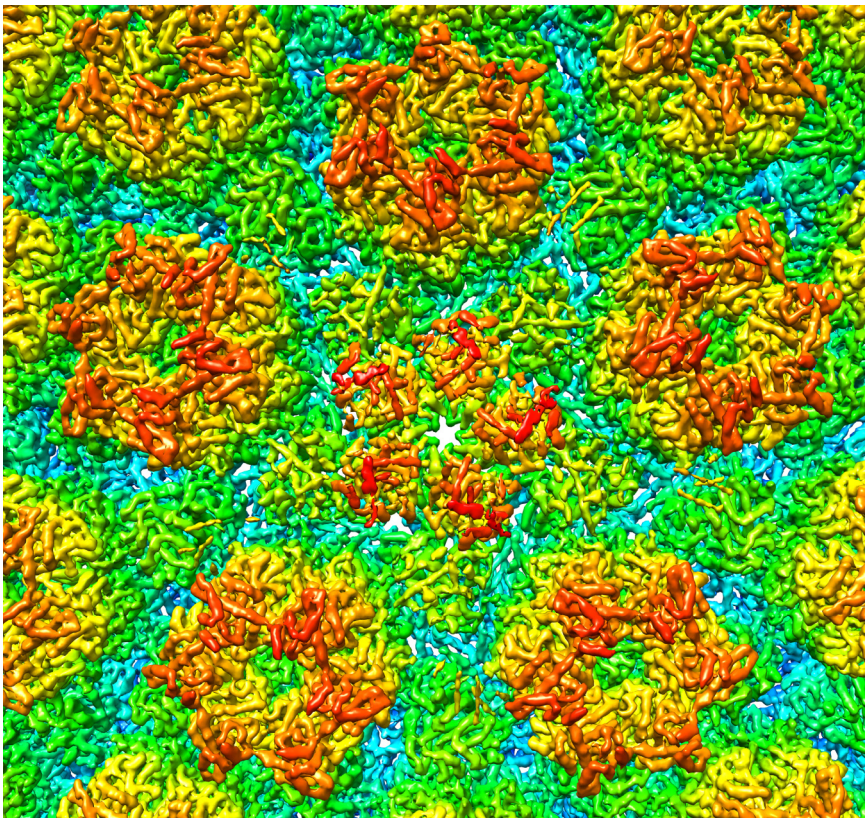

Supplement: JVI.01509-14_zjv999099680so4.pdf [file JVI.01509-14_zjv999099680so4.pdf]
